# Supplementary material for: Functional Characterization of An Allene Oxide Synthase Involved in Biosynthesis of Jasmonic Acid and Its Influence on Metabolite Profiles and Ethylene Formation in Tea (Camellia sinensis) Flowers
Source: PubMed Central journal article supplement (PMC6121675; doi:10.3390/ijms19082440), 2018-08-18
Supplement: ijms-19-02440-s001.pdf [file ijms-19-02440-s001.pdf]

## SUPPLEMENTARY INFORMATION

# Functional Characterization of *An Allene Oxide Synthase* Involved in Biosynthesis of Jasmonic Acid and Its Influence on Metabolite Profiles and Ethylene Formation in Tea (*Camellia sinensis*) Flowers

Qiyuan Peng <sup>1,2,†</sup>, Ying Zhou <sup>1,†</sup>, Yinyin Liao <sup>1,2</sup>, Lanting Zeng <sup>1,2</sup>, Xinlan Xu <sup>1</sup>, Yongxia Jia <sup>1</sup>, Fang Dong <sup>3</sup>, Jianlong Li <sup>4</sup>, Jinchi Tang <sup>4</sup>, Ziyin Yang <sup>1,2,\*</sup>

<sup>1</sup> Guangdong Provincial Key Laboratory of Applied Botany & Key Laboratory of South China Agricultural Plant Molecular Analysis and Genetic Improvement, South China Botanical Garden, Chinese Academy of Sciences, Xingke Road 723, Tianhe District, Guangzhou 510650, China; pqyuan@scbg.ac.cn (Q.P.); yzhou@scbg.ac.cn (Y.Z.); honey\_yyliao@scbg.ac.cn (Y.L.); zenglanting@scbg.ac.cn (L.Z.); xxl@scbg.ac.cn (X.X.); jyx@scbg.ac.cn (Y.J.)

<sup>2</sup> University of Chinese Academy of Sciences, No. 19A Yuquan Road, Beijing 100049, China

<sup>3</sup> Guangdong Food and Drug Vocational College, Longdongbei Road 321, Tianhe District, Guangzhou 510520, China; dongfangxyz@163.com (F.D.)

<sup>4</sup> Tea Research Institute, Guangdong Academy of Agricultural Sciences & Guangdong Provincial Key Laboratory of Tea Plant Resources Innovation and Utilization, Dafeng Road 6, Tianhe District, Guangzhou 510640, China; skylong.41@163.com (J.L.); tangjinchi@126.com (J.T.)

† These authors contributed equally to this work.

\* Correspondence: zyyang@scbg.ac.cn; Tel./Fax: +86-20-3807-2989

**Table S1.** Primers of first round of AOS-PCR.

| Gene | Forward primer 5'-3' | Reverse primer 3'-5' |
|------|----------------------|----------------------|
| AOS1 | CCCCAAACCCAAGCAATGT  | TGATTTACCACGGCAAGTG  |
| AOS2 | CCCCACAGCCCATTATCT   | TGCGTTGGACCGCC       |

AOS1, allene oxide synthase1; AOS2, allene oxide synthase 2.

**Table S2.** Primers of second round of AOS-PCR.

| Gene | Forward primer 5'-3'           | Reverse primer 3'-5'        |
|------|--------------------------------|-----------------------------|
| AOS1 | AAAGGATCCATGTCTTCTTCATCTATTTTC | GGGACTAGTAGTCCACGTAGCCTTAG  |
| AOS2 | AAAGGATCCATGGCATCATCTTCTTT     | GGGCAAAGTAAACTAGCTCTCTTCAGC |

AOS1, allene oxide synthase 1; AOS2, allene oxide synthase 2.

**Table S3.** Primers of qRT-PCR used in this study.

| Gene          | Forward primer 5'-3'    | Reverse primer 3'-5'      |
|---------------|-------------------------|---------------------------|
| <i>CsEF1</i>  | TTGGACAAGCTCAAGGCTGAACG | ATGGCCAGGAGCATCAAT GACAGT |
| <i>CsACS1</i> | TGAGAGGCGATAGAGTGACATT  | GCTGCTTCCAAGGCTGATT       |
| <i>CsEIN3</i> | GGTAAGGAAGGAGTTGATGCT   | CCGCTTGGTATTTTCGCTATTG    |

EF1, encoding elongation factor 1; ACS1, 1-aminocyclopropane-1-carboxylic acid synthase 1; EIN3, ethylene-insensitive 3;.
